# Supplementary material
Source: publisher figshare collection journal article supplement (https://sage.figshare.com/ndownloader/files/22412481)
Supplement: Supplementary file 1 [file 22412481]

**The grey digital divide in SNS use in Europe. Results from a quantitative study – Supplementary material.**

Table S1: Personal and positional categories associated with SNS use by country and year (logistic regression models) for the 65-74 years old population

| Variables                                                             | Countries |    |    |    |    |    |    |    |    |    |    |    |    |    |    |    |
|-----------------------------------------------------------------------|-----------|----|----|----|----|----|----|----|----|----|----|----|----|----|----|----|
|                                                                       | AT        |    |    |    | BE |    |    |    | BG |    |    |    | CY |    |    |    |
|                                                                       | 13        | 14 | 15 | 16 | 13 | 14 | 15 | 16 | 13 | 14 | 15 | 16 | 13 | 14 | 15 | 16 |
| <i>Personal categories</i>                                            |           |    |    |    |    |    |    |    |    |    |    |    |    |    |    |    |
| Gender (male=1, female=0)                                             | ns        | +  | +  | +  | +  | ns | +  | ns |
| <i>Positional categories</i>                                          |           |    |    |    |    |    |    |    |    |    |    |    |    |    |    |    |
| Education (ref. at most lower secondary education)                    |           |    |    |    |    |    |    |    |    |    |    |    |    |    |    |    |
| Upper secondary and post-secondary non tertiary education             | ns        | ns | ns | +  | ns | ns | +  | ns | ns | +  | +  | +  | +  | +  | +  | +  |
| Tertiary education                                                    | ns        | +  | ns | +  | +  | ns | +  | +  | +  | +  | +  | +  | +  | +  | +  | +  |
| Employment status (employed, self-employed, unemployed=1; inactive=0) | ns        | ns | ns | ns | ns | +  | ns | ns | +  | +  | +  | +  | +  | ns | ns | +  |
| Income (ref: lowest quartile)                                         |           |    |    |    |    |    |    |    |    |    |    |    |    |    |    |    |
| Second lowest quartile                                                | ns        | ns | ns | ns | ns | ns | ns | +  | +  | ns | ns | +  | ns | ns | ns | +  |
| Second highest quartile                                               | ns        | ns | ns | ns | ns | +  | +  | +  | +  | +  | +  | ns | ns | ns | ns | ns |
| Highest quartile                                                      | ns        | ns | ns | ns | ns | +  | +  | +  | ns | +  | +  | ns | ns | ns | ns | ns |
| Urban level (ref: thinly pop. area)                                   |           |    |    |    |    |    |    |    |    |    |    |    |    |    |    |    |
| Densely populated area                                                | +         | ns | ns | ns | +  | ns | ns | ns | ns | ns | ns | +  | ns | -  | ns | -  |
| Intermediate density area                                             | ns        | ns | +  | ns | ns | -  | ns | ns | ns | -  | ns | ns | ns | ns | ns | ns |
| Constant                                                              | -         | -  | -  | -  | -  | -  | -  | -  | -  | -  | -  | -  | -  | -  | -  | -  |

Table S1 (continued): Personal and positional categories associated with SNS use by country and year (logistic regression models) for the 65-74 years old population

| Variables                                                             | Countries |    |    |    |    |    |    |    |    |    |    |    |    |    |    |    |
|-----------------------------------------------------------------------|-----------|----|----|----|----|----|----|----|----|----|----|----|----|----|----|----|
|                                                                       | DK        |    |    |    | EE |    |    |    | EL |    |    |    | ES |    |    |    |
|                                                                       | 13        | 14 | 15 | 16 | 13 | 14 | 15 | 16 | 13 | 14 | 15 | 16 | 13 | 14 | 15 | 16 |
| <i>Personal categories</i>                                            |           |    |    |    |    |    |    |    |    |    |    |    |    |    |    |    |
| Gender (male=1, female=0)                                             | ns        | -  | ns | ns | ns | ns | -  | -  |    | ns | ns | ns | ns | ns | -  | ns |
| <i>Positional categories</i>                                          |           |    |    |    |    |    |    |    |    |    |    |    |    |    |    |    |
| Education (ref. at most lower                                         |           |    |    |    |    |    |    |    |    |    |    |    |    |    |    |    |
| Upper secondary and post-secondary non tertiary education             | +         | +  | ns | ns | -  | ns | ns | +  |    | +  | +  | +  | +  | +  | +  | +  |
| Tertiary education                                                    | ns        | ns | ns | +  | ns | +  | +  | +  |    | +  | +  | +  | +  | +  | +  | +  |
| Employment status (employed, self-employed, unemployed=1; inactive=0) | ns        | +  | ns | ns | +  | ns | +  | ns |    | ns | ns | ns | +  | ns | +  | ns |
| Income (ref: lowest quartile)                                         |           |    |    |    |    |    |    |    |    |    |    |    |    |    |    |    |
| Second lowest quartile                                                | ns        | +  | ns | ns | ns | ns | ns | ns |    | ns | ns | ns | ns | +  | +  | +  |
| Second highest quartile                                               | ns        | +  | +  | ns | ns | ns | ns | ns |    | +  | ns | ns | ns | +  | +  | +  |
| Highest quartile                                                      | ns        | ns | ns | ns | ns | ns | ns | ns |    | +  | ns | +  | +  | +  | +  | ns |
| Urban level (ref: thinly pop. area)                                   |           |    |    |    |    |    |    |    |    |    |    |    |    |    |    |    |
| Densely populated area                                                | ns        | ns | ns | ns | ns | ns | ns | ns |    | ns | ns | ns | ns | ns | +  | ns |
| Intermediate density area                                             | ns        | ns | ns | ns | ns | ns | ns | ns |    | -  | ns | ns | ns | ns | ns | ns |
| Constant                                                              | -         | -  | -  | -  | -  | -  | -  | -  |    | -  | -  | -  | -  | -  | -  | -  |

Table S1 (continued): Personal and positional categories associated with SNS use by country and year (logistic regression models) for the 65-74 years old population

| Variables                           | Countries |    |    |    |    |    |    |    |    |    |    |    |    |    |    |    |
|-------------------------------------|-----------|----|----|----|----|----|----|----|----|----|----|----|----|----|----|----|
|                                     | FR        |    |    |    | HR |    |    |    | HU |    |    |    | IT |    |    |    |
|                                     | 13        | 14 | 15 | 16 | 13 | 14 | 15 | 16 | 13 | 14 | 15 | 16 | 13 | 14 | 15 | 16 |
| <i>Personal categories</i>          |           |    |    |    |    |    |    |    |    |    |    |    |    |    |    |    |
| Gender (male=1, female=0)           | +         | ns | ns | ns |    |    | ns | ns | ns | ns | ns | -  | +  |    |    |    |
| <i>Positional categories</i>        |           |    |    |    |    |    |    |    |    |    |    |    |    |    |    |    |
| Education (ref. at most lower       |           |    |    |    |    |    |    |    |    |    |    |    |    |    |    |    |
| Upper secondary and post-           |           |    |    |    |    |    |    |    |    |    |    |    |    |    |    |    |
| secondary non tertiary              |           |    |    |    |    |    |    |    |    |    |    |    |    |    |    |    |
| education                           | +         | ns | ns | +  |    |    | -  | +  | +  | +  | +  | +  | +  |    | ns | +  |
| Tertiary education                  | +         | +  | ns | +  |    |    | ns | +  | +  | +  | +  | +  | +  |    | +  | ns |
| Employment status (employed,        |           |    |    |    |    |    |    |    |    |    |    |    |    |    |    |    |
| self-employed, unemployed=1;        |           |    |    |    |    |    |    |    |    |    |    |    |    |    |    |    |
| inactive=0)                         | ns        | ns | ns | ns |    |    | ns | ns | ns | ns | ns | ns | +  |    | ns | +  |
| Income (ref: lowest quartile)       |           |    |    |    |    |    |    |    |    |    |    |    |    |    |    |    |
| Second lowest quartile              | ns        | ns | ns | ns |    |    | +  | +  | +  | +  | +  | ns | ns |    | ns | ns |
| Second highest quartile             | ns        | ns | ns | ns |    |    | ns | +  | +  | +  | +  | +  | +  |    | ns | ns |
| Highest quartile                    | ns        | ns | +  | ns |    |    | +  | +  | +  | +  | +  | +  | +  |    | ns | ns |
| Urban level (ref: thinly pop. area) |           |    |    |    |    |    |    |    |    |    |    |    |    |    |    |    |
| Densely populated area              | ns        | ns | ns | ns |    |    | ns |    | ns | ns |
| Intermediate density area           | ns        | ns | ns | ns |    |    | ns |    | ns | ns |
| Constant                            | -         | -  | -  | -  |    |    | -  | -  | ns | -  | -  | -  | ns |    | -  | -  |

Table S1 (continued): Personal and positional categories associated with SNS use by country and year (logistic regression models) for the 65-74 years old population

| Variables                                                             | Countries |    |    |    |    |    |    |    |    |    |    |    |    |    |    |    |
|-----------------------------------------------------------------------|-----------|----|----|----|----|----|----|----|----|----|----|----|----|----|----|----|
|                                                                       | LU        |    |    |    | LV |    |    |    | MT |    |    |    | NL |    |    |    |
|                                                                       | 13        | 14 | 15 | 16 | 13 | 14 | 15 | 16 | 13 | 14 | 15 | 16 | 13 | 14 | 15 | 16 |
| <i>Personal categories</i>                                            |           |    |    |    |    |    |    |    |    |    |    |    |    |    |    |    |
| Gender (male=1, female=0)                                             | ns        | ns | ns | ns | ns | ns | ns | ns | ns | ns |    |    | ns | ns | ns | ns |
| <i>Positional categories</i>                                          |           |    |    |    |    |    |    |    |    |    |    |    |    |    |    |    |
| Education (ref. at most lower secondary education)                    |           |    |    |    |    |    |    |    |    |    |    |    |    |    |    |    |
| Upper secondary and post-secondary non tertiary education             | ns        | ns | ns | ns | +  | +  | +  | +  | ns | +  |    |    | ns | ns | +  | ns |
| Tertiary education                                                    | ns        | ns | ns | ns | +  | +  | +  | +  | +  | ns |    |    | +  | ns | +  | ns |
| Employment status (employed, self-employed, unemployed=1; inactive=0) | ns        | ns | ns | +  | ns | +  | +  | +  | ns | ns |    |    | ns | ns | ns | ns |
| Income (ref: lowest quartile)                                         |           |    |    |    |    |    |    |    |    |    |    |    |    |    |    |    |
| Second lowest quartile                                                | ns        | ns | ns | ns | +  | ns | +  | +  | ns | ns |    |    | ns | ns | ns | ns |
| Second highest quartile                                               | ns        | ns | ns | ns | +  | ns | +  | ns | ns | ns |    |    | ns | +  | ns | ns |
| Highest quartile                                                      | ns        | ns | ns | ns | +  | +  | ns | +  | ns | ns |    |    | ns | ns | ns | ns |
| Urban level (ref: thinly pop. area)                                   |           |    |    |    |    |    |    |    |    |    |    |    |    |    |    |    |
| Densely populated area                                                | ns        | ns | ns | ns | ns | ns | ns | ns | ns | ns |    |    | ns | ns | ns | +  |
| Intermediate density area                                             | ns        | ns | ns | ns | ns | ns | ns | ns | ns | ns |    |    | ns | ns | ns | ns |
| Constant                                                              | -         | -  | -  | ns | -  | -  | -  | -  | ns | -  |    |    | -  | -  | -  | -  |

Table S1 (continued): Personal and positional categories associated with SNS use by country and year (logistic regression models) for the 65-74 years old population

| Variables                                                             | Countries |    |    |    |    |    |    |    |    |    |    |    |    |    |    |    |
|-----------------------------------------------------------------------|-----------|----|----|----|----|----|----|----|----|----|----|----|----|----|----|----|
|                                                                       | PL        |    |    |    | PT |    |    |    | RO |    |    |    | SE |    |    |    |
|                                                                       | 13        | 14 | 15 | 16 | 13 | 14 | 15 | 16 | 13 | 14 | 15 | 16 | 13 | 14 | 15 | 16 |
| <i>Personal categories</i>                                            |           |    |    |    |    |    |    |    |    |    |    |    |    |    |    |    |
| Gender (male=1, female=0)                                             | ns        | ns | ns | ns | +  | ns | ns | ns | ns | ns | ns | +  | ns | ns | ns | ns |
| <i>Positional categories</i>                                          |           |    |    |    |    |    |    |    |    |    |    |    |    |    |    |    |
| Education (ref. at most lower                                         |           |    |    |    |    |    |    |    |    |    |    |    |    |    |    |    |
| Upper secondary and post-secondary non tertiary education             | +         | +  | +  | +  | +  | +  | +  | +  | +  | +  | +  | +  | ns | ns | ns | ns |
| Tertiary education                                                    | +         | +  | +  | +  | +  | ns | ns | +  | +  | +  | +  | +  | +  | ns | ns | ns |
| Employment status (employed, self-employed, unemployed=1; inactive=0) | ns        | ns | ns | +  | ns |
| Income (ref: lowest quartile)                                         |           |    |    |    |    |    |    |    |    |    |    |    |    |    |    |    |
| Second lowest quartile                                                | ns        | ns | ns | ns | ns | +  | ns | +  | ns | ns | ns | +  | ns | ns | ns | ns |
| Second highest quartile                                               | ns        | +  | ns | ns | +  | +  | +  | +  | ns | ns | +  | +  | ns | ns | +  | ns |
| Highest quartile                                                      | +         | ns | ns | ns | +  | +  | +  | +  | ns | ns | +  | +  | ns | ns | +  | ns |
| Urban level (ref: thinly pop. area)                                   |           |    |    |    |    |    |    |    |    |    |    |    |    |    |    |    |
| Densely populated area                                                | ns        | ns | ns | ns | ns | +  | +  | +  | +  | +  | ns | ns | ns | ns | ns | ns |
| Intermediate density area                                             | ns        | ns | ns | ns | ns | ns | +  | ns | +  | +  | ns | ns | ns | ns | ns | ns |
| Constant                                                              | -         | -  | -  | -  | -  | -  | -  | -  | -  | -  | -  | -  | -  | -  | -  | -  |

Table S1 (continued): Personal and positional categories associated with SNS use by country and year (logistic regression models) for the 65-74 years old population

| Variables                                                             | Country |    |    |    |
|-----------------------------------------------------------------------|---------|----|----|----|
|                                                                       | SK      |    |    |    |
|                                                                       | 13      | 14 | 15 | 16 |
| <i>Personal categories</i>                                            |         |    |    |    |
| Gender (male=1, female=0)                                             | ns      | ns | ns | -  |
| <i>Positional categories</i>                                          |         |    |    |    |
| Education (ref. at most lower secondary education)                    |         |    |    |    |
| Upper secondary and post-secondary non tertiary education             | ns      | ns | -  | ns |
| Tertiary education                                                    | ns      | +  | ns | ns |
| Employment status (employed, self-employed, unemployed=1; inactive=0) | +       | ns | ns | ns |
| Income (ref: lowest quartile)                                         |         |    |    |    |
| Second lowest quartile                                                | +       | ns | ns | +  |
| Second highest quartile                                               | +       | ns | ns | ns |
| Highest quartile                                                      | ns      | ns | ns | +  |
| Urban level (ref: thinly pop. area)                                   |         |    |    |    |
| Densely populated area                                                | ns      | +  | ns | ns |
| Intermediate density area                                             | ns      | ns | ns | ns |
| Constant                                                              | -       | -  | -  | -  |

Note: “+” indicates a positive and significant coefficient ( $p < 0.05$ ), “-” a negative and significant coefficient. ns stands for not significant. Grey cells signal that data are not available for that country-year. Numbers 13 to 16 in the third row represents years from 2013 to 2016.

Table S2: Personal and positional categories associated with SNS use by country and year (logistic regression models) for the 55-64 years old population

| Variables                                                             | Countries |    |    |    |    |    |    |    |    |    |    |    |    |    |    |    |
|-----------------------------------------------------------------------|-----------|----|----|----|----|----|----|----|----|----|----|----|----|----|----|----|
|                                                                       | AT        |    |    |    | BE |    |    |    | BG |    |    |    | CY |    |    |    |
|                                                                       | 13        | 14 | 15 | 16 | 13 | 14 | 15 | 16 | 13 | 14 | 15 | 16 | 13 | 14 | 15 | 16 |
| <i>Personal categories</i>                                            |           |    |    |    |    |    |    |    |    |    |    |    |    |    |    |    |
| Gender (male=1, female=0)                                             | ns        | ns | ns | ns | ns | ns | ns | ns | ns | -  | -  | -  | ns | ns | ns | ns |
| <i>Positional categories</i>                                          |           |    |    |    |    |    |    |    |    |    |    |    |    |    |    |    |
| Education (ref. at most lower secondary education)                    |           |    |    |    |    |    |    |    |    |    |    |    |    |    |    |    |
| Upper secondary and post-secondary non tertiary education             | +         | +  | ns | +  | ns | +  | +  | ns | +  | +  | +  | +  | +  | +  | +  | +  |
| Tertiary education                                                    | +         | +  | ns | +  | +  | +  | +  | +  | +  | +  | +  | +  | +  | +  | +  | +  |
| Employment status (employed, self-employed, unemployed=1; inactive=0) | ns        | ns | ns | +  | ns | ns | ns | +  | +  | +  | +  | +  | +  | ns | ns | +  |
| Income (ref: lowest quartile)                                         |           |    |    |    |    |    |    |    |    |    |    |    |    |    |    |    |
| Second lowest quartile                                                | ns        | ns | ns | ns | ns | ns | +  | +  | ns | +  | ns | ns | ns | ns | ns | ns |
| Second highest quartile                                               | ns        | ns | ns | ns | +  | +  | +  | +  | ns | +  | ns | +  | ns | ns | ns | +  |
| Highest quartile                                                      | ns        | ns | ns | ns | +  | +  | +  | +  | +  | +  | ns | +  | ns | ns | ns | +  |
| Urban level (ref: thinly pop. area)                                   |           |    |    |    |    |    |    |    |    |    |    |    |    |    |    |    |
| Densely populated area                                                | ns        | ns | +  | ns | +  | +  | +  | ns | ns | ns | ns | ns | +  | +  | ns | ns |
| Intermediate density area                                             | ns        | ns | ns | +  | ns | -  | ns |
| Constant                                                              | -         | -  | -  | -  | -  | -  | -  | -  | -  | -  | -  | -  | -  | -  | -  | -  |

Table S2 (continued): Personal and positional categories associated with SNS use by country and year (logistic regression models) for the 65-74 years old population

| Variables                           | Countries |    |    |    |    |    |    |    |    |    |    |    |    |    |    |    |
|-------------------------------------|-----------|----|----|----|----|----|----|----|----|----|----|----|----|----|----|----|
|                                     | DK        |    |    |    | EE |    |    |    | EL |    |    |    | ES |    |    |    |
|                                     | 13        | 14 | 15 | 16 | 13 | 14 | 15 | 16 | 13 | 14 | 15 | 16 | 13 | 14 | 15 | 16 |
| <i>Personal categories</i>          |           |    |    |    |    |    |    |    |    |    |    |    |    |    |    |    |
| Gender (male=1, female=0)           | ns        | -  | ns | -  | -  | -  | -  | -  |    | -  | ns | ns | ns | ns | ns | -  |
| <i>Positional categories</i>        |           |    |    |    |    |    |    |    |    |    |    |    |    |    |    |    |
| Education (ref. at most lower       |           |    |    |    |    |    |    |    |    |    |    |    |    |    |    |    |
| Upper secondary and post-           |           |    |    |    |    |    |    |    |    |    |    |    |    |    |    |    |
| secondary non tertiary              | ns        | ns | ns | ns | ns | ns | ns | ns |    | +  | +  | +  | +  | +  | +  | +  |
| education                           |           |    |    |    |    |    |    |    |    |    |    |    |    |    |    |    |
| Tertiary education                  | ns        | ns | ns | +  | +  | +  | ns | +  |    | +  | +  | +  | +  | +  | +  | +  |
| Employment status (employed,        |           |    |    |    |    |    |    |    |    |    |    |    |    |    |    |    |
| self-employed, unemployed=1;        | ns        | +  | ns | ns | +  | ns | ns | +  |    | +  | +  | +  | +  | +  | +  | +  |
| inactive=0)                         |           |    |    |    |    |    |    |    |    |    |    |    |    |    |    |    |
| Income (ref: lowest quartile)       |           |    |    |    |    |    |    |    |    |    |    |    |    |    |    |    |
| Second lowest quartile              | ns        | -  | ns | ns | ns | ns | ns | ns |    | ns | ns | ns | ns | +  | +  | +  |
| Second highest quartile             | ns        | ns | ns | ns | ns | +  | ns | +  |    | ns | +  | ns | ns | +  | +  | +  |
| Highest quartile                    | ns        | ns | ns | ns | ns | ns | ns | ns |    | ns | +  | +  | +  | +  | +  | +  |
| Urban level (ref: thinly pop. area) |           |    |    |    |    |    |    |    |    |    |    |    |    |    |    |    |
| Densely populated area              | ns        | ns | ns | +  | ns | ns | ns | ns |    | ns | ns | ns | ns | ns | +  | +  |
| Intermediate density area           | ns        | ns | ns | ns | ns | +  | ns | ns |    | ns | ns | ns | ns | ns | ns | +  |
| Constant                            | -         |    |    | -  | -  | -  | -  | -  |    | -  | -  | -  | -  | -  | -  | -  |



Table S2 (continued): Personal and positional categories associated with SNS use by country and year (logistic regression models) for the 65-74 years old population

| Variables                           | Countries |    |    |    |    |    |    |    |    |    |    |    |    |    |    |    |
|-------------------------------------|-----------|----|----|----|----|----|----|----|----|----|----|----|----|----|----|----|
|                                     | FR        |    |    |    | HR |    |    |    | HU |    |    |    | IT |    |    |    |
|                                     | 13        | 14 | 15 | 16 | 13 | 14 | 15 | 16 | 13 | 14 | 15 | 16 | 13 | 14 | 15 | 16 |
| <i>Personal categories</i>          |           |    |    |    |    |    |    |    |    |    |    |    |    |    |    |    |
| Gender (male=1, female=0)           | ns        | ns | ns | -  |    |    | ns | ns | -  | -  | -  | -  | ns |    |    |    |
| <i>Positional categories</i>        |           |    |    |    |    |    |    |    |    |    |    |    |    |    |    |    |
| Education (ref. at most lower       |           |    |    |    |    |    |    |    |    |    |    |    |    |    |    |    |
| Upper secondary and post-           |           |    |    |    |    |    |    |    |    |    |    |    |    |    |    |    |
| secondary non tertiary              |           |    |    |    |    |    |    |    |    |    |    |    |    |    |    |    |
| education                           | +         | ns | ns | +  |    |    | +  | +  | +  | +  | +  | +  |    |    | -  | ns |
| Tertiary education                  | +         | ns | ns | +  |    |    | +  | +  | +  | +  | +  | +  |    |    | ns | +  |
| Employment status (employed,        |           |    |    |    |    |    |    |    |    |    |    |    |    |    |    |    |
| self-employed, unemployed=1;        |           |    |    |    |    |    |    |    |    |    |    |    |    |    |    |    |
| inactive=0)                         | +         | +  | ns | ns |    |    | ns | ns | +  | +  | ns | ns | +  |    | +  | +  |
| Income (ref: lowest quartile)       |           |    |    |    |    |    |    |    |    |    |    |    |    |    |    |    |
| Second lowest quartile              | ns        | +  | ns | ns |    |    | ns | ns | +  | ns | ns | +  | ns |    | ns | ns |
| Second highest quartile             | ns        | +  | ns | ns |    |    | ns | ns | +  | +  | +  | +  | ns |    | +  | +  |
| Highest quartile                    | ns        | +  | +  | ns |    |    | +  | ns | +  | +  | +  | +  | ns |    | +  | +  |
| Urban level (ref: thinly pop. area) |           |    |    |    |    |    |    |    |    |    |    |    |    |    |    |    |
| Densely populated area              | ns        | ns | ns | ns |    |    | ns | ns | ns | +  | +  | +  | +  |    | ns | ns |
| Intermediate density area           | ns        | ns | ns | ns |    |    | ns | ns | ns | +  | +  | ns | ns |    | ns | ns |
| Constant                            | -         | -  | -  | -  |    |    | -  | -  | -  | -  | -  | -  | -  |    | -  | -  |

Table S2 (continued): Personal and positional categories associated with SNS use by country and year (logistic regression models) for the 65-74 years old population

| Variables                                                             | Countries |    |    |    |    |    |    |    |    |    |    |    |    |    |    |    |
|-----------------------------------------------------------------------|-----------|----|----|----|----|----|----|----|----|----|----|----|----|----|----|----|
|                                                                       | LU        |    |    |    | LV |    |    |    | MT |    |    |    | NL |    |    |    |
|                                                                       | 13        | 14 | 15 | 16 | 13 | 14 | 15 | 16 | 13 | 14 | 15 | 16 | 13 | 14 | 15 | 16 |
| <i>Personal categories</i>                                            |           |    |    |    |    |    |    |    |    |    |    |    |    |    |    |    |
| Gender (male=1, female=0)                                             | ns        | ns | ns | ns | -  | ns | -  | -  | ns | ns |    |    | ns | -  | -  | ns |
| <i>Positional categories</i>                                          |           |    |    |    |    |    |    |    |    |    |    |    |    |    |    |    |
| Education (ref. at most lower secondary education)                    |           |    |    |    |    |    |    |    |    |    |    |    |    |    |    |    |
| Upper secondary and post-secondary non tertiary education             | ns        | ns | ns | ns | +  | +  | +  | +  | ns | ns |    |    | +  | ns | ns | ns |
| Tertiary education                                                    | ns        | ns | ns | ns | +  | +  | +  | +  | ns | +  |    |    | ns | ns | ns | ns |
| Employment status (employed, self-employed, unemployed=1; inactive=0) | ns        | ns | ns | ns | +  | +  | ns | +  | ns | ns |    |    | +  |    | +  | ns |
| Income (ref: lowest quartile)                                         |           |    |    |    |    |    |    |    |    |    |    |    |    |    |    |    |
| Second lowest quartile                                                | ns        | ns | ns | ns | ns | ns | +  | ns | ns | ns |    |    | ns | ns | ns | ns |
| Second highest quartile                                               | ns        | ns | ns | ns | +  | ns | +  | +  | ns | ns |    |    | ns | +  | ns | ns |
| Highest quartile                                                      | ns        | ns | ns | ns | +  | +  | +  | +  | ns | ns |    |    | ns |    | ns | ns |
| Urban level (ref: thinly pop. area)                                   |           |    |    |    |    |    |    |    |    |    |    |    |    |    |    |    |
| Densely populated area                                                | ns        | ns | ns | ns | ns | ns | ns | ns | ns | ns |    |    | +  | +  | ns | ns |
| Intermediate density area                                             | ns        | ns | ns | ns | ns | ns | ns | ns | ns | ns |    |    | ns | +  | ns | ns |
| Constant                                                              | -         | ns | ns | ns | -  | -  | -  | -  | -  | ns |    |    | -  | -  | -  | ns |

Table S2 (continued): Personal and positional categories associated with SNS use by country and year (logistic regression models) for the 65-74 years old population

| Variables                                                             | Countries |    |    |    |    |    |    |    |    |    |    |    |    |    |    |    |    |    |    |    |
|-----------------------------------------------------------------------|-----------|----|----|----|----|----|----|----|----|----|----|----|----|----|----|----|----|----|----|----|
|                                                                       | PL        |    |    |    | PT |    |    |    | RO |    |    |    | SE |    |    |    | SI |    |    |    |
|                                                                       | 13        | 14 | 15 | 16 | 13 | 14 | 15 | 16 | 13 | 14 | 15 | 16 | 13 | 14 | 15 | 16 | 13 | 14 | 15 | 16 |
| <i>Personal categories</i>                                            |           |    |    |    |    |    |    |    |    |    |    |    |    |    |    |    |    |    |    |    |
| Gender (male=1, female=0)                                             | ns        | -  | ns | ns | ns | ns | ns | -  | ns | ns | -  | -  | ns | ns | -  | -  | ns | ns | ns | ns |
| <i>Positional categories</i>                                          |           |    |    |    |    |    |    |    |    |    |    |    |    |    |    |    |    |    |    |    |
| Education (ref. at most lower                                         |           |    |    |    |    |    |    |    |    |    |    |    |    |    |    |    |    |    |    |    |
| Upper secondary and post-secondary non tertiary education             | +         | +  | +  | +  | +  | +  | +  | +  | +  | +  | +  | +  | ns | ns | +  | ns | +  | ns | ns | ns |
| Tertiary education                                                    | +         | +  | +  | +  | +  | +  | +  | +  | +  | +  | +  | +  | +  | +  | +  | ns | +  | ns | ns | ns |
| Employment status (employed, self-employed, unemployed=1; inactive=0) | +         | +  | +  | +  | ns | ns | ns | ns | +  | +  | +  | +  | ns | +  |    | ns | ns | ns | ns | ns |
| Income (ref: lowest quartile)                                         |           |    |    |    |    |    |    |    |    |    |    |    |    |    |    |    |    |    |    |    |
| Second lowest quartile                                                | ns        | +  | ns | +  | +  | +  | +  | +  | ns | ns | +  | ns | ns | +  | ns | ns | ns | ns | ns | ns |
| Second highest quartile                                               | +         | +  | +  | +  | +  | +  | +  | +  | +  | +  | +  | ns |
| Highest quartile                                                      | +         | +  | ns | +  | +  | +  | +  | +  | +  | +  | +  | +  | ns | ns | ns | ns | ns | +  | ns | ns |
| Urban level (ref: thinly pop. area)                                   |           |    |    |    |    |    |    |    |    |    |    |    |    |    |    |    |    |    |    |    |
| Densely populated area                                                | ns        | +  | ns | +  | ns | +  | +  | +  | +  | +  | +  | +  | ns |
| Intermediate density area                                             | ns        | ns | +  | +  | ns | ns | ns | +  | +  | +  | +  | ns |
| Constant                                                              | -         | -  | -  | -  | -  | -  | -  | -  | -  | -  | -  | -  | -  | -  | -  |    | -  | -  | -  | -  |

Table S2 (continued): Personal and positional categories associated with SNS use by country and year (logistic regression models) for the 65-74 years old population

| Variables                                                             | Country |    |    |    |
|-----------------------------------------------------------------------|---------|----|----|----|
|                                                                       | SK      |    |    |    |
|                                                                       | 13      | 14 | 15 | 16 |
| <i>Personal categories</i>                                            |         |    |    |    |
| Gender (male=1, female=0)                                             | ns      | ns | -  | ns |
| <i>Positional categories</i>                                          |         |    |    |    |
| Education (ref. at most lower secondary education)                    |         |    |    |    |
| Upper secondary and post-secondary non tertiary education             | ns      | ns | +  | +  |
| Tertiary education                                                    | ns      | +  | ns | +  |
| Employment status (employed, self-employed, unemployed=1; inactive=0) | +       | +  | +  | ns |
| Income (ref: lowest quartile)                                         |         |    |    |    |
| Second lowest quartile                                                | ns      | +  | ns | +  |
| Second highest quartile                                               | ns      | +  | ns |    |
| Highest quartile                                                      | ns      | +  | ns | +  |
| Urban level (ref: thinly pop. area)                                   |         |    |    |    |
| Densely populated area                                                | +       | ns | ns | +  |
| Intermediate density area                                             | +       | ns | ns |    |
| Constant                                                              | -       | -  | -  | -  |

Note: “+” indicates a positive and significant coefficient ( $p < 0.05$ ), “-” a negative and significant coefficient. “ns” stands for not significant. Grey cells signal that data are not available for that country-year. Numbers 13 to 16 in the third row represents years from 2013 to 2016.
